# Supplementary material for: Microporous surface containing flower-like molybdenum disulfide submicro-spheres of sulfonated polyimide with antibacterial effect and promoting bone regeneration and osteointegration
Source: Royal Society of Chemistry journal article supplement (doi:10.1039/d2bm00622g), 2022-01-01
Supplement: d2bm00622g1.pdf [file d2bm00622g1.pdf]

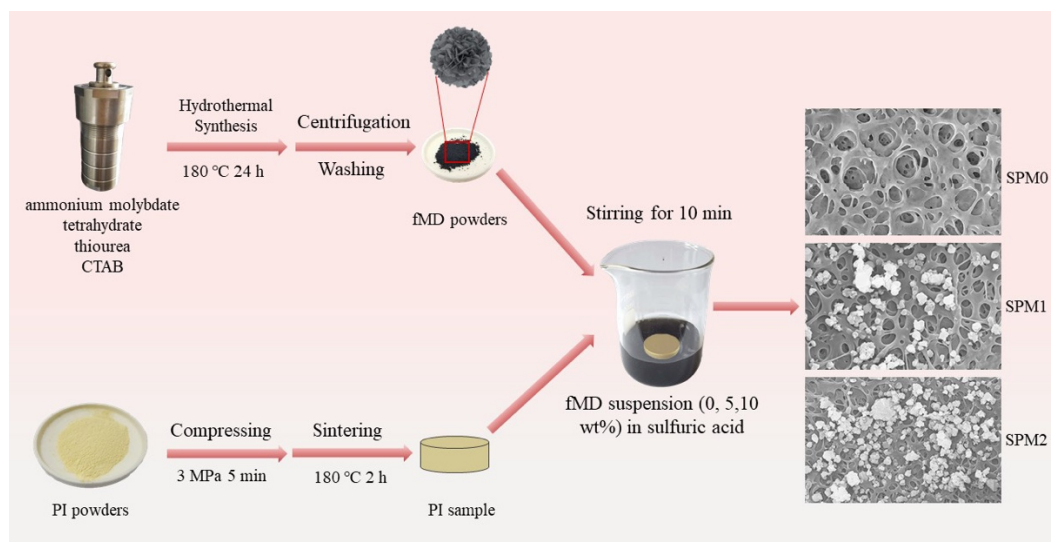

**Fig. S1** Schematic illustration of synthesis of fMD and fabrication of SPM0, SPM1 and SPM2

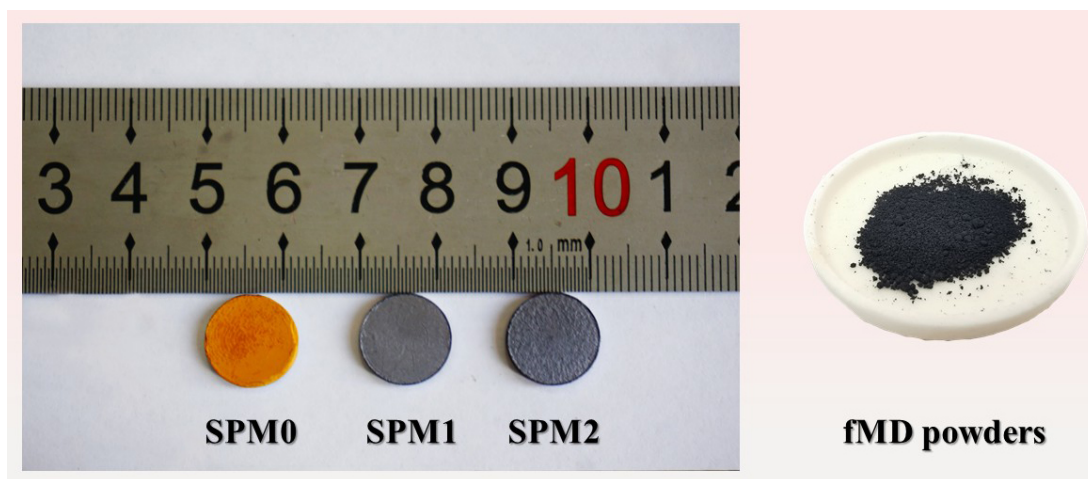

**Fig. S2** Digital photos of SPM0, SPM1 and SPM2, and fMD powders

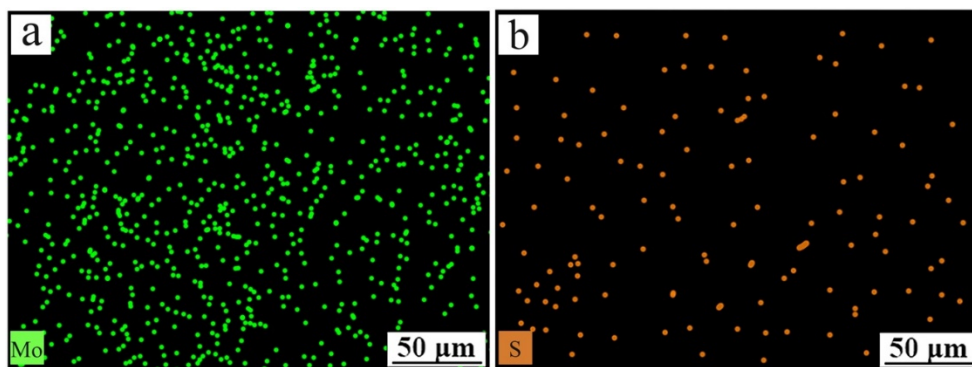

**Fig. S3** EDS mapping (a: green dots indicate Mo element, and b: orange dots indicate S element) of fMD
